# Supplementary material
Source: publisher figshare collection journal article supplement (https://acs.figshare.com/ndownloader/files/5075992)
Supplement: Supplementary file 1 [file 5075992]

## Supporting Information in the manuscript

### BiScO<sub>3</sub>: centrosymmetric BiMnO<sub>3</sub>-type oxide

Alexei A. Belik,<sup>\* a</sup> Satoshi Iikubo,<sup>b</sup> Katsuaki Kodama,<sup>b</sup> Naoki Igawa,<sup>b</sup> Shin-ichi Shamoto,<sup>b</sup> Makoto Maie,<sup>c</sup> Takuro Nagai,<sup>d</sup> Yoshio Matsui,<sup>c</sup> Sergey Yu. Stefanovich,<sup>e</sup> Bogdan I. Lazoryak,<sup>e</sup> Eiji Takayama-Muromachi<sup>c</sup>

*International Center for Young Scientists (ICYS), High Voltage Electron Microscopy Station (HVEMS), and Advanced Materials Laboratory (AML), National Institute for Materials Science (NIMS), 1-1 Namiki, Tsukuba, Ibaraki 305-0044, Japan, Neutron Science Research Center, Japan Atomic Energy Research Institute, Tokai, Ibaraki, 319-1195, Japan, and Department of Chemistry, Moscow State University, Moscow, 119992, Russia*

<sup>a</sup> ICYS

<sup>b</sup> Neutron Science Research Center

<sup>c</sup> AML

<sup>d</sup> HVEMS

<sup>e</sup> Moscow State University

\* To whom correspondence should be addressed. ICYS, NIMS, E-mail: Alexei.BELIK@nims.go.jp

The author to contact:

**A.A. Belik**

Tel: +81 (029) 851-3354 (ext. 8587)

FAX: +81 (029) 860-4706

e-mail: Alexei.BELIK@nims.go.jp

International Center for Young Scientists, National Institute for Materials Science, Namiki 1-1, Tsukuba, Ibaraki, 305-0044, Japan

**Synthesis.** Stoichiometric mixtures of  $\text{Bi}_2\text{O}_3$  and  $\text{Sc}_2\text{O}_3$  were dried at 873 K for 8 h and then placed in Au capsules and treated at 6 G Pa in a belt-type high pressure apparatus at 1413 K for 40 min. After heat treatment, the samples were quenched to room temperature (RT), and the pressure was slowly released.  $\text{BiScO}_3$  was recovered from a Au capsule in the form of powder.  $\text{BiScO}_3$  was white.  $\text{BiScO}_3$  contained small amount of  $\text{Sc}_2\text{O}_3$  according to X-ray powder diffraction data.

**X-ray Powder Diffraction (XRD) Experiments.** XRD data of  $\text{BiScO}_3$  were collected at room temperature on a RIGAKU Ultima III diffractometer using  $\text{CuK}\alpha$  radiation ( $2\theta$  range of 4–100°, a step width of 0.02°, and a counting time of 10 s/step).

**Neutron Powder Diffraction Experiments and Structure Refinements.** Neutron powder diffraction data of  $\text{BiScO}_3$  were collected at room temperature with the high-resolution powder diffractometer (HRPD) installed at the JRR-3M reactor in JAERI, Tokai. The incident neutron wavelength was 1.8233(10) Å. About 4.66 g of the sample was contained in a V holder (diameter: 6.0 mm). The holder was slowly oscillated during the measurement. The data were taken with a step of ca. 0.05° in a  $2\theta$  range between 2.5 and 162° with 64  $^3\text{He}$  detectors. The measurement time was 18 h.

Neutron powder diffraction data were analyzed by the Rietveld method with RIETAN-2000.<sup>1</sup> The background was represented by a 9th-order Legendre polynomial. The split pseudo-Voigt function of Toraya<sup>2</sup> was used as a profile function. Isotropic atomic displacement parameters,  $U$ , with the isotropic Debye–Waller factor represented as  $\exp(-8\pi^2 U \sin^2 \theta / \lambda^2)$  were assigned to all the sites. Bound coherent scattering lengths,  $b_c$ , used for the structure refinement were 8.532 fm (Bi), 12.290 fm (Sc), and 5.803 fm (O).<sup>3</sup>

For the impurity of  $\text{Sc}_2\text{O}_3$ , we refined only a scale factor and the  $a$  lattice parameter, fixing its structure parameters. The mass percentage of  $\text{Sc}_2\text{O}_3$  in  $\text{BiScO}_3$  was calculated at 0.3 % from the refined scale factors.

**Electron Diffraction.** The electron diffraction patterns were obtained using an ultra-high-voltage transmission electron microscope (Hitachi H-1500) operated at an accelerating voltage of 820 kV. The TEM specimens were prepared by crushing the synthesized samples into fine fragments, which were ultrasonically dispersed in  $\text{CCl}_4$  and transferred to carbon microgrids.

**Second-Harmonic Generation (SHG) Experiments.** SHG responses of powder samples were measured in a reflection scheme. A Q-switch pulsed Nd:YAG laser operated at  $\lambda_{\omega} = 1064$  nm was used as a radiation source with a repetition rate of 4 impulses/s and a duration of impulses of about 12 ns. The laser beam was split into two beams to excite the radiation at a doubled frequency,  $\lambda_{2\omega}$ , of 532 nm simultaneously in samples to be measured and a reference sample: polycrystalline  $\alpha$ -SiO<sub>2</sub>. The incident-beam peak power was about 0.1 MW on a spot 3 mm in diameter on the surface of the sample.

**Table S1. Selected Bond Lengths,  $l$  (Å), and Bond Valence Sums,  $BVS$ ,<sup>4</sup> in BiScO<sub>3</sub> in space group  $C2/c$**

| Bonds             | $l$ and $BVS$ |
|-------------------|---------------|
| Bi – O3           | 2.154(3)      |
| Bi – O2           | 2.193(3)      |
| Bi – O1           | 2.246(3)      |
| Bi – O1a          | 2.553(3)      |
| Bi – O3a          | 2.897(3)      |
| Bi – O2a          | 3.019(3)      |
| Bi – O3b          | 3.036(3)      |
| Bi – O2b          | 3.257(3)      |
| $BVS(\text{Bi})$  | 2.89          |
| Sc1 – O2 (×2)     | 2.086(3)      |
| Sc1 – O1 (×2)     | 2.110(3)      |
| Sc1 – O3 (×2)     | 2.157(3)      |
| $BVS(\text{Sc1})$ | 2.91          |
| Sc2 – O3 (×2)     | 2.096(3)      |
| Sc2 – O1 (×2)     | 2.117(3)      |
| Sc2 – O2 (×2)     | 2.136(3)      |
| $BVS(\text{Sc2})$ | 2.92          |

**Table S2. Structure Parameters Determined for BiScO<sub>3</sub>  
at Room Temperature from Neutron Powder Diffraction Data in Space  
Group *C2*<sup>a</sup>**

| Site             | Wyckoff<br>position | <i>x</i>   | <i>y</i>    | <i>z</i>   | 10 <sup>2</sup> <i>U</i> (Å <sup>2</sup> ) |
|------------------|---------------------|------------|-------------|------------|--------------------------------------------|
| Bi1              | 4 <i>c</i>          | 0.1405(8)  | −0.0470(19) | 0.3913(6)  | 0.86(16)                                   |
| Bi2              | 4 <i>c</i>          | 0.3683(8)  | 0.0824(18)  | 0.1205(8)  | 0.28(15)                                   |
| Sc1 <sup>b</sup> | 2 <i>a</i>          | 0.0        | 0.0         | 0.0        | 0.42(18)                                   |
| Sc2              | 4 <i>c</i>          | 0.2469(7)  | 0.0036(24)  | 0.7484(7)  | 0.80(6)                                    |
| Sc3              | 2 <i>b</i>          | 0.5        | 0.0043(9)   | 0.5        | 0.34(18)                                   |
| O1               | 4 <i>c</i>          | 0.0874(9)  | −0.0518(24) | 0.8376(11) | 0.8(3)                                     |
| O2               | 4 <i>c</i>          | 0.4261(10) | 0.0758(24)  | 0.6719(12) | 1.4(3)                                     |
| O3               | 4 <i>c</i>          | 0.1647(10) | 0.3041(20)  | 0.6255(10) | 1.0(2)                                     |
| O4               | 4 <i>c</i>          | 0.3642(8)  | 0.2998(18)  | 0.4137(8)  | −0.7(2)                                    |
| O5               | 4 <i>c</i>          | 0.3431(10) | 0.2440(20)  | 0.9171(10) | 1.4(3)                                     |
| O6               | 4 <i>c</i>          | 0.1546(8)  | 0.2414(19)  | 0.1041(8)  | −0.3(2)                                    |

<sup>a</sup> Space group *C2* (No 5); *Z* = 8; *a* = 9.8906(5) Å, *b* = 5.8222(3) Å, *c* = 10.0467(5) Å, and  $\beta$  = 108.303(3)°; *V* = 549.26(4) Å<sup>3</sup>. *R*<sub>wp</sub> = 5.14 % (*S* = *R*<sub>wp</sub>/*R*<sub>e</sub> = 1.99), *R*<sub>p</sub> = 3.82 %, *R*<sub>B</sub> = 1.50 %, and *R*<sub>F</sub> = 0.72 %. The occupation of all the sites is unity.

<sup>b</sup> The Sc1 site was placed at the origin (*y* = 0) owing to the arbitrariness of setting the origin in the non-centrosymmetric space group of *C2*.

**Table S3. Structure Parameters Determined for BiScO<sub>3</sub>  
at Room Temperature from Neutron Powder Diffraction Data in Space  
Group *Cc*<sup>a</sup>**

| Site             | Wyckoff<br>position | <i>x</i>    | <i>y</i>   | <i>z</i>   | 10 <sup>2</sup> <i>U</i> (Å <sup>2</sup> ) |
|------------------|---------------------|-------------|------------|------------|--------------------------------------------|
| Bi1              | 4 <i>a</i>          | 0.1287(10)  | 0.1779(12) | 0.1318(11) | 1.0(2)                                     |
| Bi2              | 4 <i>a</i>          | 0.8568(8)   | 0.1898(10) | 0.3630(10) | 0.1(2)                                     |
| Sc1              | 4 <i>a</i>          | −0.0037(11) | 0.2478(3)  | 0.7489(10) | 0.49(7)                                    |
| Sc2 <sup>b</sup> | 4 <i>a</i>          | 1/4         | 0.2508(12) | 1/2        | 0.36(7)                                    |
| O1               | 4 <i>a</i>          | 0.0702(11)  | 0.1786(15) | 0.5787(14) | 0.0(2)                                     |
| O2               | 4 <i>a</i>          | 0.9084(13)  | 0.1998(20) | 0.9124(15) | 2.0(3)                                     |
| O3               | 4 <i>a</i>          | 0.1507(15)  | 0.5356(20) | 0.3767(13) | 1.9(3)                                     |
| O4               | 4 <i>a</i>          | 0.8302(12)  | 0.5263(14) | 0.1436(10) | −0.9(2)                                    |
| O5               | 4 <i>a</i>          | 0.3403(11)  | 0.5173(16) | 0.1696(13) | 0.8(3)                                     |
| O6               | 4 <i>a</i>          | 0.6298(11)  | 0.5420(13) | 0.3373(12) | −0.5(2)                                    |

<sup>a</sup> Space group *Cc* (No 9); *Z* = 8; *a* = 9.8905(5) Å, *b* = 5.8222(3) Å, *c* = 10.0471(5) Å, and  $\beta$  = 108.299(3)°; *V* = 549.30(4) Å<sup>3</sup>. *R*<sub>wp</sub> = 5.02 % (*S* = 1.94), *R*<sub>p</sub> = 3.70 %, *R*<sub>B</sub> = 1.33 %, and *R*<sub>F</sub> = 0.56 %. The occupation of all the sites is unity.

<sup>b</sup> The Sc2 site was placed at (1/4, *y*, 1/2) owing to the arbitrariness of setting the origin in the non-centrosymmetric space group of *Cc*.

The lower values of *R* factors of the *Cc* model (38 refined structure parameters) compared with those of *C2* model (39 refined structure parameters) can be explained by the fact that space group *Cc* is ‘closer’ to the real space group (*C2/c*) from the view point of reflection conditions. The lower values of *R* factors of the *Cc* model (38 refined structure parameters) compared with those of *C2/c* model (19 refined structure parameters) can be explained by the larger number of the refined structure parameters in the *Cc* model.

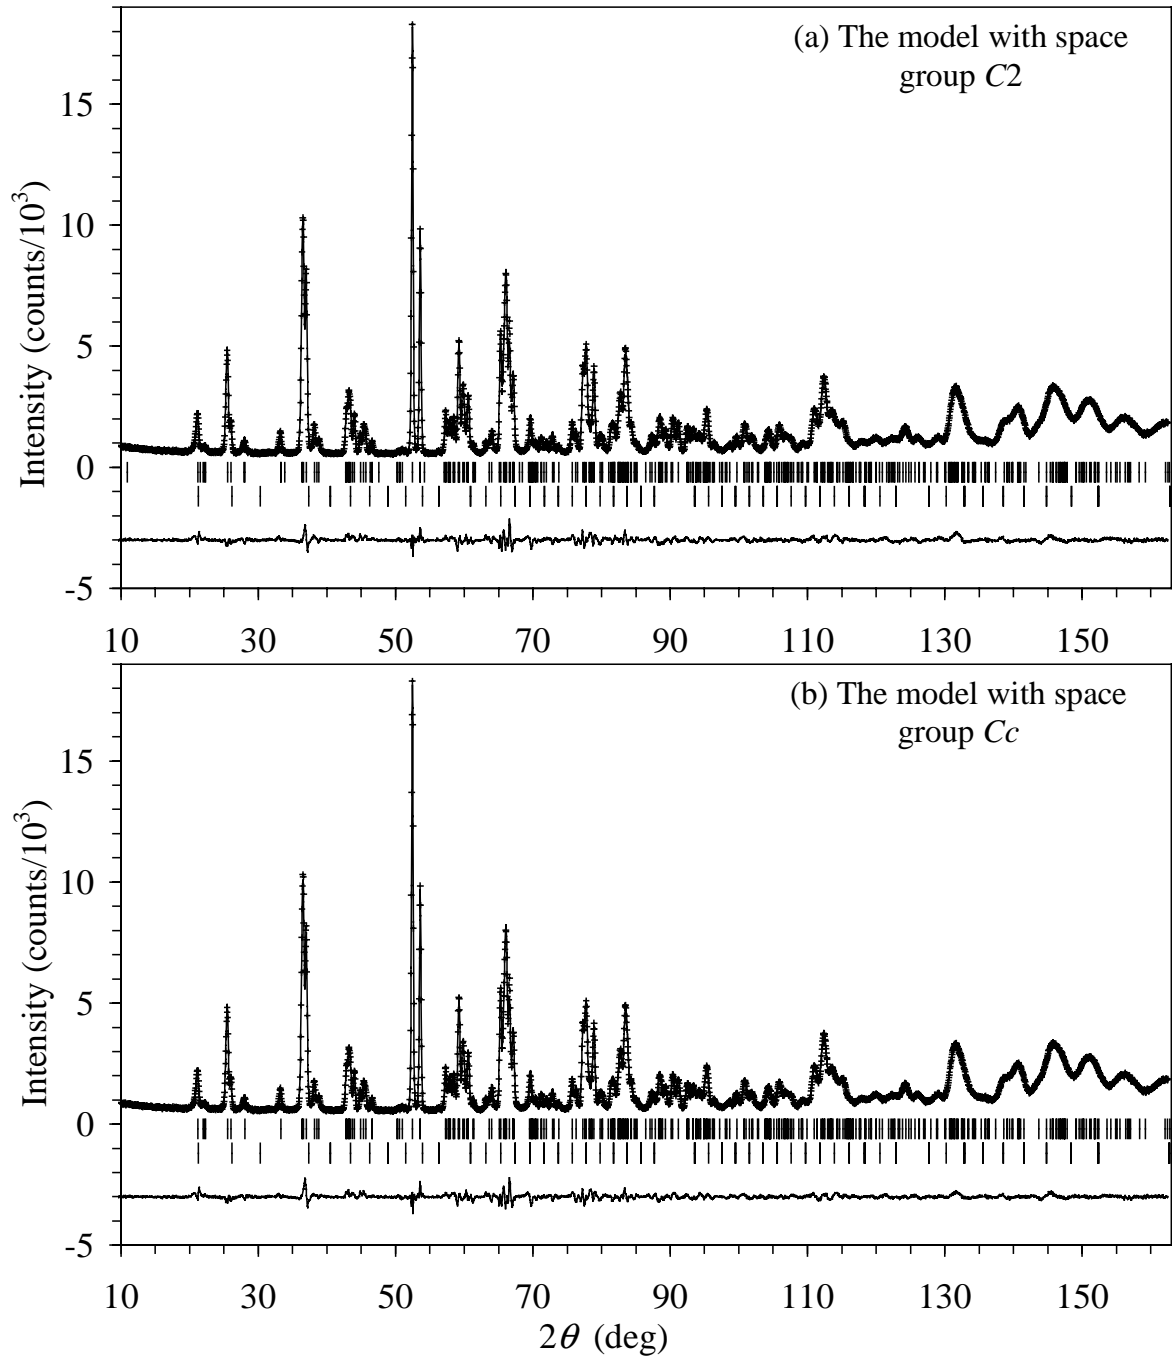

FIG. S1 Observed (crosses), calculated (solid line), and difference patterns resulting from the Rietveld analysis of the neutron powder diffraction data for  $\text{BiScO}_3$  in space groups  $C2$  and  $Cc$ . Bragg reflections are indicated by tick marks. The lower tick marks are given for the impurity phase,  $\text{Sc}_2\text{O}_3$ .

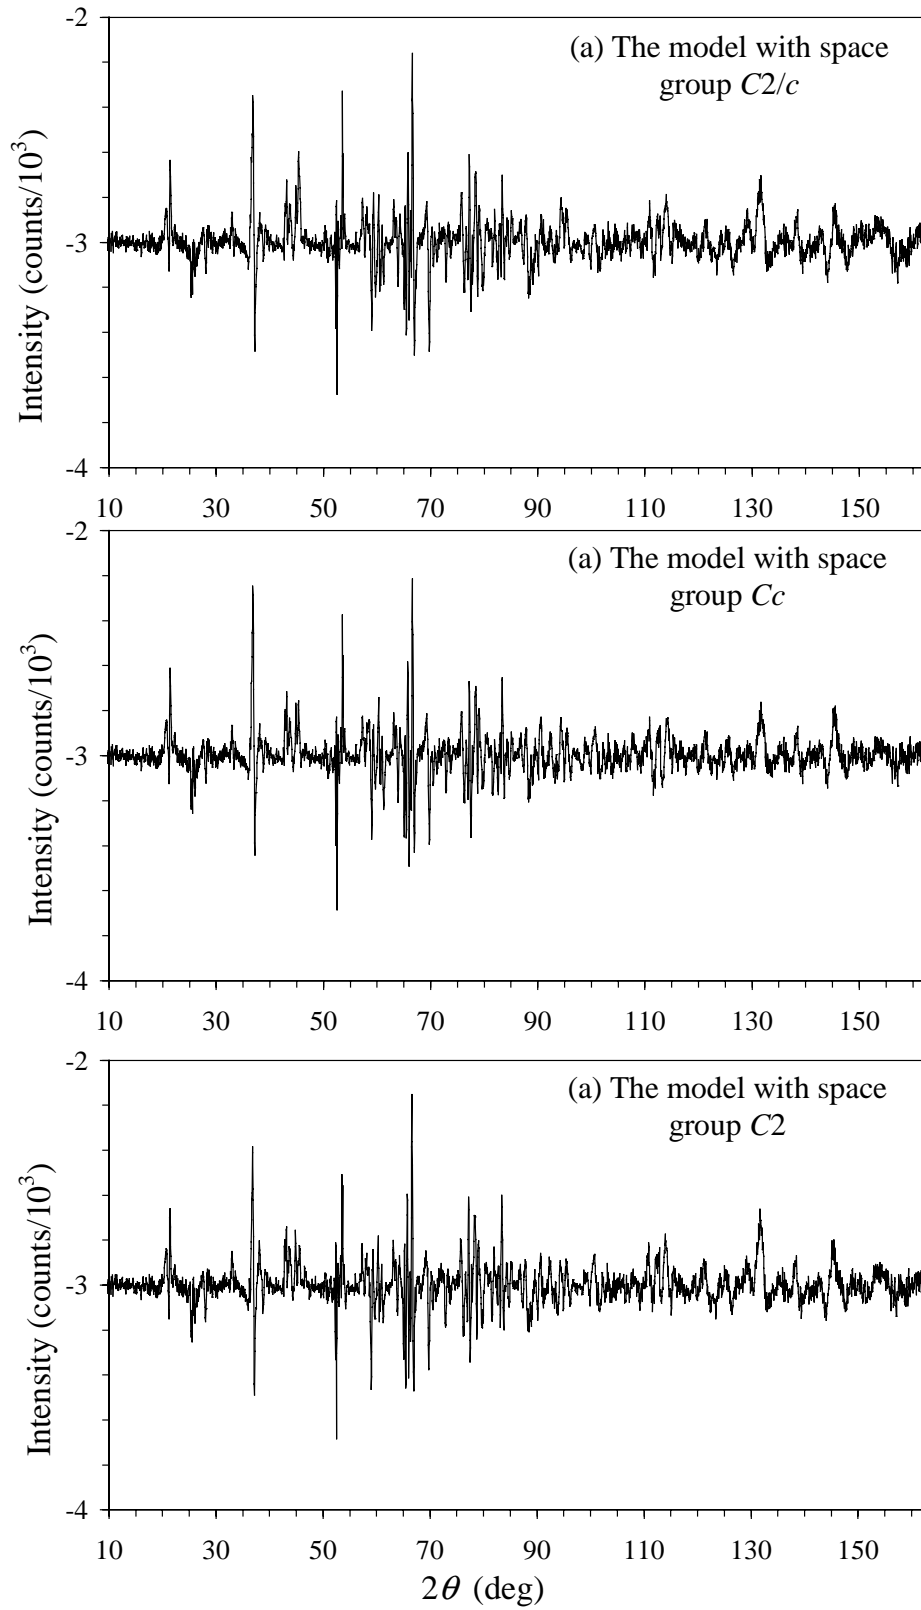

FIG. S2 Enlarged difference patterns resulting from the Rietveld analysis of the neutron powder diffraction data for  $\text{BiScO}_3$  in space groups  $C2/c$ ,  $Cc$ , and  $C2$ .



## References

1. Izumi, F.; Ikeda, T. *Mater. Sci. Forum* **2000**, 321–324, 198.
2. Toraya, H. *J. Appl. Crystallogr.* **1990**, 23, 485.
3. Sears, V. F. *International Tables for Crystallography*; 2nd ed.; Kluwer: Dordrecht, 1999; Vol. C, pp 440–450.
4. Brese, R. E.; O’Keeffe, M. *Acta Crystallogr., Sec. B* **1991**, 47, 192.
